# Supplementary material for: Multilevel approach to individual and organisational predictors of stress and fatigue among healthcare workers of a university hospital: a longitudinal study
Source: HighWire-hosted journal article supplement (doi:10.1136/oemed-2022-108220), 2022-08-18
Supplement: oemed-2022-108220supp001_data_supplement.pdf [file oemed-2022-108220supp001_data_supplement.pdf]

## Supplemental materials

### **A multilevel approach to individual and organizational predictors of stress and fatigue among healthcare workers of a university hospital: a longitudinal study**

by Oumou Salama Daouda<sup>1</sup>, René Sosata Bun, Karim Ait Bouziad, Katiuska Miliiani, Anastasia Essaworo, Florence Espinasse, Delphine Seytre, Anne Casetta, Simone Nérome, Adelaide Nascimento, Pascal Astagneau, Laura Temime, Mounia N Hocine

<sup>1</sup> Correspondence concerning this article should be addressed to Ms. Oumou S. Daouda, MESuRS laboratory, Cnam, 292 rue Saint Martin, 75003 Paris, France (email: [oumou-salama.daouda@lecnam.net](mailto:oumou-salama.daouda@lecnam.net))

#### **Table of contents**

**Supplementary figure 1:** Distribution of PSS-10 score. by hospital. The vertical dashed lines represent the means of the PSS-10 scores by hospital

**Supplementary figure 2:** Distribution of Pichot score by hospital. The vertical dashed lines represent the means of the Pichot scores by hospital

**Supplementary table 1.** Characteristics of individuals and missing values at the times of visits (t0, t1, t2 and t3)

**Supplementary table 2:** Means and ranges of outcomes variables (PSS-10 and Pichot scores), by time of visits

**Supplementary table 3:** Outcomes (PSS-10 and Pichot scores), and missing values by hospital

**Supplementary table 4:** Unconditional 2 and 3-level models for outcomes of perceived stress and fatigue

**Supplementary table 5:** Summary of missing values according to validated scales, by time of visits

**Supplementary figure 1:** Distribution of PSS-10 score by hospital. The vertical dashed lines represent the means of the PSS-10 scores by hospital

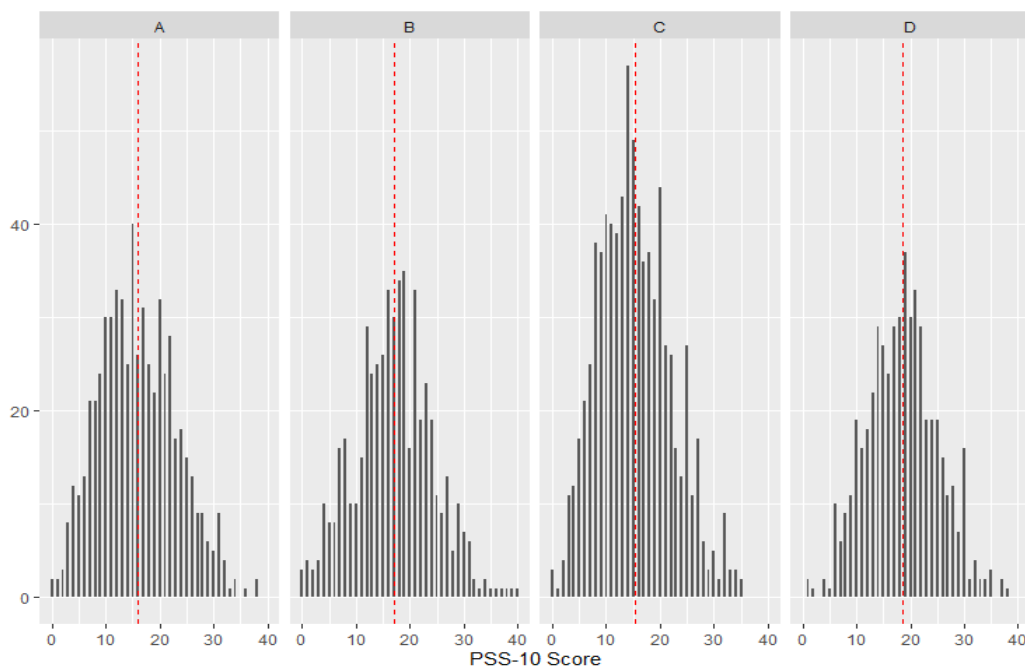

**Supplementary figure 2:** Distribution of Pichot score by hospital. The vertical dashed lines represent the means of the Pichot scores by hospital

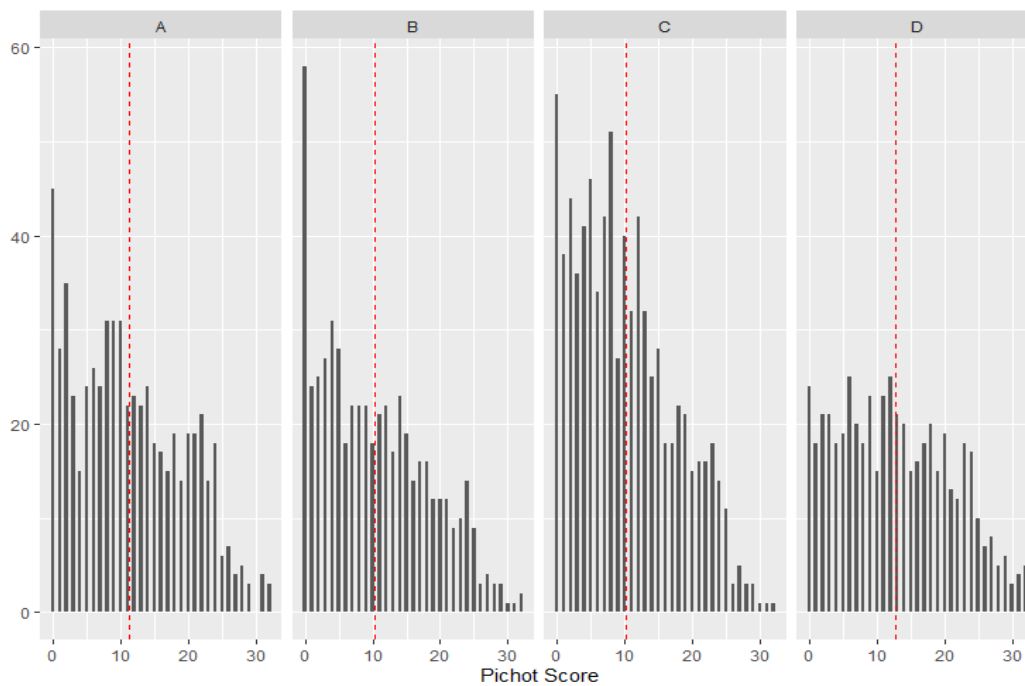

**Supplementary table 1.** Characteristics of individuals and missing values at the times of visits (t0, t1, t2 and t3)

Two-sided ANOVA tests were performed for continuous variables and Chi square tests were performed for qualitative variables

|                                       | t0 (N=694)  | t1 (N=644)  | t2 (N=578)  | t3 (N=556)  | Total (N=2472) | p value |
|---------------------------------------|-------------|-------------|-------------|-------------|----------------|---------|
| <b>Work schedule of last months</b>   |             |             |             |             |                | 0.636   |
| Daily                                 | 458 (66.0%) | 436 (67.7%) | 381 (65.9%) | 357 (64.2%) | 1632 (66.0%)   |         |
| Nightly                               | 198 (28.5%) | 185 (28.7%) | 170 (29.4%) | 168 (30.2%) | 721 (29.2%)    |         |
| Day and Night                         | 38 (5.5%)   | 23 (3.6%)   | 27 (4.7%)   | 31 (5.6%)   | 119 (4.8%)     |         |
| <b>Schedule assignment frequency</b>  |             |             |             |             |                | < 0.001 |
| Mostly                                | 76 (11.0%)  | 47 (7.3%)   | 23 (4.0%)   | 36 (6.5%)   | 182 (7.4%)     |         |
| Always                                | 618 (89.0%) | 597 (92.7%) | 555 (96.0%) | 519 (93.5%) | 2289 (92.6%)   |         |
| Missing                               | 0           | 0           | 0           | 1           | 1              |         |
| <b>Nightshift/duty on last months</b> |             |             |             |             |                | < 0.001 |
| No                                    | 564 (81.4%) | 380 (59.1%) | 324 (56.2%) | 319 (57.7%) | 1587 (64.4%)   |         |
| Yes                                   | 129 (18.6%) | 263 (40.9%) | 252 (43.8%) | 234 (42.3%) | 878 (35.6%)    |         |
| Missing                               | 1           | 1           | 2           | 3           | 7              |         |
| <b>Number of nightshift/duties</b>    |             |             |             |             |                | < 0.001 |
| Mean (SD)                             | 0.6 (1.7)   | 1.3 (2.2)   | 1.5 (2.3)   | 1.5 (2.4)   | 1.2 (2.2)      |         |
| Missing                               | 4           | 5           | 2           | 3           | 14             |         |
| <b>Work schedule variation</b>        |             |             |             |             |                | 0.762   |
| Never                                 | 404 (58.2%) | 360 (55.9%) | 334 (57.8%) | 319 (57.4%) | 1417 (57.3%)   |         |
| Fairly often                          | 122 (17.6%) | 123 (19.1%) | 94 (16.3%)  | 100 (18.0%) | 439 (17.8%)    |         |
| Almost Never                          | 146 (21.0%) | 132 (20.5%) | 133 (23.0%) | 114 (20.5%) | 525 (21.2%)    |         |
| Very often                            | 22 (3.2%)   | 29 (4.5%)   | 17 (2.9%)   | 23 (4.1%)   | 91 (3.7%)      |         |
| <b>Overtime hours</b>                 |             |             |             |             |                | 0.098   |
| Never                                 | 238 (34.3%) | 209 (32.5%) | 177 (30.6%) | 179 (32.2%) | 803 (32.5%)    |         |
| Fairly often                          | 205 (29.5%) | 209 (32.5%) | 208 (36.0%) | 189 (34.0%) | 811 (32.8%)    |         |
| Almost Never                          | 173 (24.9%) | 180 (28.0%) | 149 (25.8%) | 139 (25.0%) | 641 (25.9%)    |         |

|                                                                                |             |             |             |             |              |         |
|--------------------------------------------------------------------------------|-------------|-------------|-------------|-------------|--------------|---------|
| Very often                                                                     | 78 (11.2%)  | 46 (7.1%)   | 44 (7.6%)   | 49 (8.8%)   | 217 (8.8%)   |         |
| <b>Irregularity of meal time</b>                                               |             |             |             |             |              | 0.047   |
| Never                                                                          | 41 (5.9%)   | 51 (7.9%)   | 34 (5.9%)   | 37 (6.7%)   | 163 (6.6%)   |         |
| Fairly often                                                                   | 191 (27.6%) | 182 (28.3%) | 188 (32.5%) | 175 (31.5%) | 736 (29.8%)  |         |
| Almost Never                                                                   | 62 (8.9%)   | 55 (8.5%)   | 63 (10.9%)  | 69 (12.4%)  | 249 (10.1%)  |         |
| Very often                                                                     | 399 (57.6%) | 356 (55.3%) | 293 (50.7%) | 275 (49.5%) | 1323 (53.5%) |         |
| Missing                                                                        | 1           | 0           | 0           | 0           | 1            |         |
| <b>Number of canceled breaks</b>                                               |             |             |             |             |              | < 0.001 |
| Never                                                                          | 48 (6.9%)   | 75 (11.6%)  | 67 (11.6%)  | 65 (11.7%)  | 255 (10.3%)  |         |
| Fairly often                                                                   | 279 (40.2%) | 266 (41.3%) | 229 (39.6%) | 221 (39.7%) | 995 (40.3%)  |         |
| Almost Never                                                                   | 129 (18.6%) | 128 (19.9%) | 152 (26.3%) | 162 (29.1%) | 571 (23.1%)  |         |
| Very often                                                                     | 238 (34.3%) | 175 (27.2%) | 130 (22.5%) | 108 (19.4%) | 651 (26.3%)  |         |
| <b>Number of visits to the Occupational safety and health (OSH) department</b> |             |             |             |             |              | < 0.001 |
| Mean (SD)                                                                      | 0.3 (0.5)   | 0.2 (0.5)   | 0.1 (0.4)   | 0.2 (0.5)   | 0.2 (0.5)    |         |
| <b>Personal life events</b>                                                    |             |             |             |             |              | 0.148   |
| No                                                                             | 408 (58.8%) | 383 (59.6%) | 350 (60.6%) | 337 (60.6%) | 1478 (59.8%) |         |
| Yes, negative                                                                  | 217 (31.3%) | 192 (29.9%) | 166 (28.7%) | 141 (25.4%) | 716 (29.0%)  |         |
| Yes, positive                                                                  | 69 (9.9%)   | 68 (10.6%)  | 62 (10.7%)  | 78 (14.0%)  | 277 (11.2%)  |         |
| Missing                                                                        | 0           | 1           | 0           | 0           | 1            |         |
| <b>Professional life events</b>                                                |             |             |             |             |              | 0.557   |
| No                                                                             | 488 (70.5%) | 463 (71.9%) | 390 (67.6%) | 381 (68.6%) | 1722 (69.8%) |         |
| Yes, negative                                                                  | 151 (21.8%) | 139 (21.6%) | 137 (23.7%) | 123 (22.2%) | 550 (22.3%)  |         |
| Yes, positive                                                                  | 53 (7.7%)   | 42 (6.5%)   | 50 (8.7%)   | 51 (9.2%)   | 196 (7.9%)   |         |
| Missing                                                                        | 2           | 0           | 1           | 1           | 4            |         |
| <b>Sickness presenteeism</b>                                                   |             |             |             |             |              | 0.005   |
| Never                                                                          | 159 (22.9%) | 192 (29.9%) | 122 (21.1%) | 154 (27.7%) | 627 (25.4%)  |         |
| Fairly often                                                                   | 218 (31.4%) | 178 (27.7%) | 174 (30.2%) | 148 (26.7%) | 718 (29.1%)  |         |
| Almost Never                                                                   | 275 (39.6%) | 242 (37.7%) | 251 (43.5%) | 235 (42.3%) | 1003 (40.6%) |         |
| Very often                                                                     | 42 (6.1%)   | 30 (4.7%)   | 30 (5.2%)   | 18 (3.2%)   | 120 (4.9%)   |         |
| Missing                                                                        | 0           | 2           | 1           | 1           | 4            |         |
| <b>Marital status</b>                                                          |             |             |             |             |              | 0.371   |

|                                |             |             |             |             |              |         |
|--------------------------------|-------------|-------------|-------------|-------------|--------------|---------|
| Couple                         | 382 (55.0%) | 360 (55.9%) | 336 (58.3%) | 328 (59.4%) | 1406 (57.0%) |         |
| Single                         | 312 (45.0%) | 284 (44.1%) | 240 (41.7%) | 224 (40.6%) | 1060 (43.0%) |         |
| Missing                        | 0           | 0           | 2           | 4           | 6            |         |
| <b>Commuting time to work</b>  |             |             |             |             |              | 0.109   |
| <1 h                           | 290 (41.8%) | 270 (41.9%) | 253 (43.8%) | 243 (43.7%) | 1056 (42.7%) |         |
| >2h                            | 99 (14.3%)  | 91 (14.1%)  | 54 (9.3%)   | 60 (10.8%)  | 304 (12.3%)  |         |
| 1-2 h                          | 305 (43.9%) | 283 (43.9%) | 271 (46.9%) | 253 (45.5%) | 1112 (45.0%) |         |
| <b>Support from colleagues</b> |             |             |             |             |              | 0.476   |
| Mean (SD)                      | 13.2 (2.0)  | 13.1 (2.0)  | 13.1 (2.0)  | 13.0 (2.0)  | 13.1 (2.0)   |         |
| <b>Support from hierarchy</b>  |             |             |             |             |              | < 0.001 |
| Mean (SD)                      | 11.7 (2.7)  | 11.5 (2.5)  | 11.4 (2.6)  | 11.1 (2.8)  | 11.4 (2.7)   |         |
| <b>Work overcommitment</b>     |             |             |             |             |              | 0.558   |
| Mean (SD)                      | 15.5 (2.7)  | 15.4 (2.7)  | 15.3 (2.6)  | 15.3 (2.6)  | 15.4 (2.7)   |         |

**Supplementary table 2:** Means and ranges of outcomes variables (PSS-10 and Pichot scores), by time of visits

|                     | t0 (N=694) | t1 (N=644) | t2 (N=578) | t3 (N=556) | Total (N=2472) | p_value |
|---------------------|------------|------------|------------|------------|----------------|---------|
| <b>PSS-10 score</b> |            |            |            |            |                | 0.126   |
| Mean (SD)           | 17.0 (7.0) | 16.5 (7.0) | 16.3 (7.0) | 16.2 (7.1) | 16.5 (7.0)     |         |
| Range               | 0.0 - 38.0 | 0.0 - 38.0 | 1.0 - 40.0 | 0.0 - 39.0 | 0.0 - 40.0     |         |
| <b>Pichot score</b> |            |            |            |            |                | 0.028   |
| Mean (SD)           | 10.4 (7.8) | 11.5 (8.0) | 10.9 (7.9) | 11.4 (7.9) | 11.0 (7.9)     |         |
| Range               | 0.0 - 32.0 | 0.0 - 32.0 | 0.0 - 32.0 | 0.0 - 32.0 | 0.0 - 32.0     |         |

**Supplementary table 3:** Outcomes (PSS-10 and Pichot scores), and missing values by hospital

|                     | A (N=610)  | B (N=538)  | C (N=801)  | D (N=523)  | Total (N=2472) | p_value |
|---------------------|------------|------------|------------|------------|----------------|---------|
| <b>PSS-10 score</b> |            |            |            |            |                | < 0.001 |
| Mean (SD)           | 16.0 (7.2) | 17.0 (7.2) | 15.3 (6.8) | 18.6 (6.6) | 16.5 (7.0)     |         |
| Missing             | 4          | 12         | 2          | 4          | 22             |         |
| <b>Pichot score</b> |            |            |            |            |                | < 0.001 |
| Mean (SD)           | 11.4 (8.0) | 10.3 (7.9) | 10.1 (7.3) | 12.8 (8.3) | 11.0 (7.9)     |         |
| Missing             | 0          | 0          | 2          | 1          | 3              |         |

**Supplementary table 4:** Unconditional 2 and 3-level models for outcomes of perceived stress and fatigue

|                                                         | <b>Stress – PSS-10 Score</b> |                    | <b>Fatigue – Pichot Score</b> |                   |
|---------------------------------------------------------|------------------------------|--------------------|-------------------------------|-------------------|
|                                                         | <b>2-level</b>               | <b>3-level</b>     | <b>2-level</b>                | <b>3-level</b>    |
| Intercept                                               | 16.7(0.23)                   | <b>16.9 (0.38)</b> | 11.2 (0.25)                   | <b>11.4 (0.5)</b> |
| <b>Random effects - <math>\sigma^2(\sigma)^*</math></b> |                              |                    |                               |                   |
| Level 1 – Time                                          | 28.9 (5.3)                   | <b>20.9 (4.6)</b>  | 23.9 (4.8)                    | <b>23.8 (4.9)</b> |
| Level 2 – Healthcare worker                             | 28.94 (5.3)                  | <b>25.9 (5.1)</b>  | 39.12 (6.3)                   | <b>35.1 (6)</b>   |
| Level 3 – Ward                                          |                              | <b>3.2 (1.8)</b>   |                               | <b>4.6 (2.1)</b>  |
| AIC <sup>a</sup>                                        | 15762.86                     | 15737.24           | 15922.34                      | 15896.45          |
| ANOVA test p-value                                      |                              | < 2e-16            |                               | 2.25 x 10e-07     |

<sup>a</sup> AIC Akaike Information Criterion

#### Intra-class correlation coefficient (ICC) calculation

Using the 3-levels null models, ICC were computed, in order to quantify how much response variable variance is shared, or correlated, across different combinations of levels. ICC has been defined as “. . . an estimate of the expected (population) correlation between

two randomly chosen elements in the same group” [33]. As such, three different ICCs could be calculated to assess the influence of ward on change in level of stress and fatigue over time.

The level of stress and fatigue variance has been partitioned at all three levels. It can be easily shown that, the PSS-10 score and the Pichot score variations occurred due to temporal fluctuations (level 1, 42% for stress and 37.4% for fatigue), inter-individual heterogeneity (level 2, 52% for stress and 55.5% for fatigue) and ward-level specificities (level 3, 6% for stress and 7.2% for fatigue). In addition, these partitioned variances can be used to compute three different ICCs to assess the influence of ward on change in stress and fatigue level over time.

First, for the stress level, one level 3 ICC already estimated above (0.06), is interpreted as the expected correlation between two stress level drawn completely at random (from any time point), from two healthcare workers within the same service. Second, an alternative level 3 ICC estimate can be calculated as  $(3.2 / (3.2+25.9) = 0.11\%)$  and interpreted as the expected correlation between the mean (i.e., averaged across all repeated measures) stress levels from two healthcare workers drawn completely at random from the same service. Finally, a level 2 ICC could also calculate by  $(3.2 + 25.9 / (3.2+25.9+20.9) = 0.58)$  and is interpreted as the expected correlation between two repeated measurements sampled from the same healthcare workers. In the same way, 3 ICCs for fatigue are calculated and correspond to 0.07% for ICC level 3, 0.12 for the second ICC level 3 and 0.45 for the ICC level 2.

**Supplementary table 5:** Summary of missing values according to validated scales, by time of visits

|                                         | t0 | t1 | t2 | t3 | Total |
|-----------------------------------------|----|----|----|----|-------|
| PSS-10 score - Stress                   | 7  | 3  | 5  | 7  | 22    |
| Pichot score - Fatigue                  | 1  | 0  | 2  | 0  | 3     |
| Karasek score - Support from colleagues | 6  | 4  | 1  | 1  | 12    |
| Karasek score - Support from hierarchy  | 23 | 5  | 1  | 0  | 29    |
| Siegrist score - Work overcommitment    | 1  | 1  | 0  | 1  | 3     |

In the whole sample (n =2472), high number of missing values were observed on support from the hierarchy and perceived stress, respectively 29 and 22 values. The lowest number of missing values were observed on fatigue and work overcommitment, all two 3 missing values. We count 12 missing values in the whole sample for the support from colleague’s variable. Before proceeding with the 3-levels analyses, missing values were imputed.
